# Supplementary material for: A robust brain network for sustained attention from adolescence to adulthood that predicts later substance use
Source: eLife. 2024 Sep 5;13:RP97150. doi: 10.7554/eLife.97150 (PMC11377036; doi:10.7554/eLife.97150)
Supplement: Supplementary file 1. [file elife-97150-supp1.xlsx]

## Sheet: S file 1a
Supplementary file 1a. Demographic information for CPM analysis.
	Age 14	Age 19	Age 23	STRATIFY
N	716	1079	1120	304
Age (Years)	14.6 ± 0.4	19.1 ± 0.8	22.6 ± 0.7	22 ± 2.2
Sex (M/F)	316/400	496/583	530/590	240/64
Site	119/103/47/51/	145/152/76/98/	144/163/123/149/	24/0/129/151
	121/82/90/103	159/128/173/148	151/143/123/124
Mean FD	0.19 ± 0.1	0.15 ± 0.08	0.17 ± 0.08	0.17 ± 0.09
ICV	0.234±0.038	0.222±0.049	0.217±0.054	0.21 ± 0.05
GO RT	430.4 ± 61.6	397 ± 68.4	402.6 ± 73.2	427.8 ± 72.4
SSD	225.3 ± 84.4	173.5 ± 91.3	181.3 ± 122.5	180.2 ± 97.9
Stop RT	404 ± 69.8	353.9 ± 72.4	362.9 ± 78.7	376.1 ± 66.4
pOmission	1.3% ± 2.6%	1.8% ± 4.6%	3.1% ± 8.7%	3% ± 8.6%
pChoiceError	5.4% ± 7.7%	4.7% ± 3.8%	5.2% ± 7.7%	5.3% ± 4.7%
pCommission	49.6% ± 1.6%	48.3% ± 3.8%	47.5% ± 6%	48% ± 5.1%
Note: N, number of subjects; Site, London/ Nottingham/ Dublin/ Berlin/ Hamburg/ Mannheim/ Paris/ Dresden; ICV, intra-individual coefficient of variation; GO RT, reaction time in Go trials; SSD, stop signa delay; Stop RT, reaction time in Stop trials; pOmission, probability of go omissions (no response); pChoiceError, probability of choice errors derived from Go trialss; pCommission, probability o…

## Sheet: S file 1b
Supplementary file 1b. Demographic information across three timepoints for exploratory factor analysis.
	Age 14	Age 19	Age 23
N	2047	1386	1166
Age (Years)	14.4 ± 0.4	19 ± 0.7	22.6 ± 0.7
Sex (M/F)	989/1027	664/721	550/614
Site	254/328/209/256/	191/224/147/97/	162/185/138/156/
	262/246/248/213	155/178/209/184	167/147/60/149
Mean FD	0.28 ± 0.29	0.18 ± 0.13	0.18 ± 0.12
GO RT	467.5 ± 80	399.6 ± 70.4	405.4 ± 73.2
SSD	320.4 ± 148.3	187 ± 130.6	191.2 ± 162.5
Stop RT	462.4 ± 114.4	359 ± 80.2	364.8 ± 77.7
pOmission	4.5% ± 10.7%	2.6% ± 8.5%	3.9% ± 11.4%
pChoiceError	4.7% ± 6.8%	4.7% ± 4.7%	5.3% ± 7.8%
pCommission	47.9% ± 6.4%	47.5% ± 6%	47.1% ± 7.1%
Note: N, number of subjects; Site, London/ Nottingham/ Dublin/ Berlin/ Hamburg/ Mannheim/ Paris/ Dresden; GO RT, reaction time in Go trials; SSD, stop signa delay; Stop RT, reaction time in Stop trials; pOmission, probability of go omissions (no response); pChoiceError, probability of choice errors derived from Go trialss; pCommission, probability of commission on Stop trials.

## Sheet: S file 1c
Supplementary file 1c. Linear mixed model of intra-individual coefficient of variation (ICV).
	Sum (Sq)	Mean (Sq)	NumDF	DenDF	F value	Pr(>F)
Timepoint	59.8	29.9	2	1895.3	51.1449	<0.001
Sex	1.022	1.0223	1	1483.1	1.7486	0.186
Site	28.527	4.0753	7	1489.4	6.971	<0.001
Mode-center PDS	0.887	0.8875	1	1488.8	1.518	0.218
Age	0.002	0.0019	1	1464.1	0.0032	0.955
						c

## Sheet: S file 1d
Supplementary file 1d. Post-hoc test for intra-individual coefficient of variation (ICV).
Contrast	Estimate	SE	DF	t	P value
Age 14 - Age 19	0.263	0.04	2093	6.535	<.0001
Age 14 - Age 23	0.423	0.042	2060	10.109	<.0001
Age 19 - Age 23	0.159	0.033	1688	4.768	<.0001

## Sheet: S file 1e
Supplementary file 1e. Correlation of intra-individual coefficient of variation (ICV) between timepoints.
Correlation	N	R value	P value
Age 14 - Age 19	453	0.35	<2.5e-14
Age 14 - Age 23	418	0.32	<3.2e-11
Age 19 - Age 23	756	0.45	<1e-16

## Sheet: S file 1f
Supplementary file 1f. Predictive performance for intra-individual coefficient of variation (ICV) from various cross-validation (CV) schemes across three timepoints derived from Go trials, Successful stop trials and Failed stop trials.
Condition	Timepoint	Predictive network	10-fold CV			5-fold CV			leave-site-out CV
			r	P	R² (%)	r	P	R² (%)	r	P	R² (%)
Go trials	Age 14	Positive	0.25	<0.001	6.34	0.24	<0.001	5.81	0.26	<0.001	6.71
		Negative	0.25	<0.001	6.46	0.24	<0.001	5.89	0.26	<0.001	6.75
		Combined	0.28	<0.001	8.07	0.27	<0.001	7.43	0.3	<0.001	8.82
	Age 19	Positive	0.27	<0.001	7.42	0.27	<0.001	7.11	0.19	<0.001	3.43
		Negative	0.25	<0.001	6.42	0.25	<0.001	6.09	0.17	<0.001	2.86
		Combined	0.28	<0.001	7.9	0.28	<0.001	7.6	0.2	<0.001	3.81
	Age 23	Positive	0.38	<0.001	14.26	0.38	<0.001	14.41	0.26	<0.001	6.76
		Negative	0.33	<0.001	11	0.33	<0.001	10.87	0.18	<0.001	3.2
		Combined	0.37	<0.001	14.07	0.38	<0.001	14.17	0.23	<0.001	5.34
Successful stop	Age 14	Positive	0.22	<0.001	4.82	0.19	<0.001	3.69	0.15	<0.001	2.25
		Negative	0.12	0.017	1.39	0.11	0.012	1.23	0.07	0.028	0.46
		Combined	0.2	<0.001	4.16	0.18	<0.001	3.27	0.13	<0.001	1.65
	Age 19	Positive	0.19	<0.001	3.79	0.2	<0.001	4.04	0.11	<0.001	4.22
		Negative	0.15	0.001	2.21	0.15	<0.001	2.32	0.09	0.002	4.26
		Combined	0.18	<0.001	3.31	0.19	<0.001	3.6	0.11	<0.001	1.14
	Age 23	Positive	0.24	<0.001	5.86	0.24	<0.001	6.02	0.14	<0.001	1.95
		Negative	0.21	<0.001	4.43	0.21	<0.001	4.54	0.14	<0.001	2.06
		Combined	0.23	<0.001	5.33	0.24	<0.001	5.58	0.15	<0.001	2.22
Failed stop	Age 14	Positive	0.1	0.033	0.98	0.11	0.009	1.2	0.11	0.001	1.17
		Negative	0.19	<0.001	3.55	0.18	<0.001	3.16	0.16	<0.001	2.5
		Combined	0.17	<0.001	3.04	0.17	<0.001	3.04	0.16	<0.001	2.68
	Age 19	Positive	0.21	<0.001	4.42	0.2	<0.001	4.1	0.16	<0.001	2.69
		Negative	0.18	<0.001	3.33	0.18	<0.001	3.35	0.13	<0.001	1.82
		Combined	0.21	<0.001	4.45	0.21	<0.001	4.34	0.17	<0.001	2.79
	Age 23	Positive	0.33	<0.001	11.09	0.33	<0.001	10.55	0.21	<0.001	4.57
		Negative	0.35	<0.001	12.2	0.34	<0.001	11.63	0.22	<0.001	4.98
		Combined	0.36	<0.001	12.64	0.35	<0.001	12.04	0.23	<0.001	5.22

## Sheet: S file 1g
Supplementary file 1g. Correlation of network strength of sustained attention network between timepoints.
Correlation	Predictive networks	Go trials		Successful stop trials
		R value	P value	R value	P value
Age 14 - Age 19	positive	0.2	1.32e-05	0.15	0.001
	negative	0.23	1.25e-06	0.2	5.48e-05
	combined	0.31	<0.001	0.2	4.36e-08
Age 14 - Age 23	positive	0.14	0.003	0.21	8.24e-06
	negative	0.19	8.56e-05	0.18	0.000214
	combined	0.21	3.72e-09	0.21	7.79e-09
Age 19 - Age 23	positive	0.18	0.000158	0.21	4.93e-06
	negative	0.25	1.35e-07	0.25	2.35e-07
	combined	0.28	2.22e-15	0.23	1.53e-10

## Sheet: S file 1h
Supplementary file 1h. Predictive performance of intra-individual coefficient of variation (ICV) at each timepoint with distinct feature-selection thresholds using 10-fold cross validation.
Timepoint	P value	Go trials			Successful stop trials
		Positive	Negative	Combined	Positive	Negative	Combined
Age 14	0.1	0.22	0.22	0.26	0.16	0.15	0.18
	0.05	0.23	0.23	0.26	0.16	0.12	0.16
	0.01	0.25	0.25	0.28	0.22	0.11	0.2
	0.005	0.25	0.27	0.29	0.21	0.12	0.2
	0.001	0.22	0.25	0.27	0.14	0.14	0.16
	0.0005	0.21	0.22	0.25	0.12	0.14	0.14
	0.0001	0.2	0.17	0.21	0.14	0.11	0.13
Age 19	0.1	0.29	0.28	0.3	0.24	0.17	0.21
	0.05	0.29	0.27	0.29	0.23	0.17	0.22
	0.01	0.27	0.25	0.28	0.2	0.15	0.18
	0.005	0.26	0.24	0.27	0.19	0.14	0.17
	0.001	0.24	0.18	0.22	0.2	0.15	0.17
	0.0005	0.24	0.17	0.2	0.19	0.17	0.17
	0.0001	0.26	0.2	0.22	0.19	0.23	0.19
Age 23	0.1	0.43	0.4	0.42	0.27	0.22	0.26
	0.05	0.42	0.38	0.42	0.26	0.23	0.25
	0.01	0.38	0.33	0.37	0.24	0.22	0.23
	0.005	0.36	0.32	0.36	0.26	0.23	0.25
	0.001	0.36	0.3	0.35	0.29	0.28	0.28
	0.0005	0.37	0.29	0.36	0.28	0.3	0.28
	0.0001	0.38	0.29	0.36	0.3	0.33	0.3

## Sheet: S file 1i
Supplementary file 1i. Prediction for intra-individual coefficient of variation (ICV) across timepoint.
Predictive models	Predictive networks	Go trials		Successful stop trials
		r value	P value	r value	P value
Age 14 predicts Age 19	positive	0.16	<0.001	0.11	<0.001
	negative	0.14	0.001	0.12	<0.001
	combined	0.16	<0.001	0.13	<0.001
Age 14 predicts Age 23	positive	0.2	<0.001	0.14	<0.001
	negative	0.12	<0.001	0.15	<0.001
	combined	0.17	<0.001	0.15	<0.001
Age 19 predicts Age 23	positive	0.3	<0.001	0.17	<0.001
	negative	0.26	<0.001	0.16	<0.001
	combined	0.31	<0.001	0.17	<0.001
Age 23 predicts STRATIFY	positive	0.34	<0.001	0.26	<0.001
	negative	0.34	<0.001	0.22	<0.001
	combined	0.35	<0.001	0.26	<0.001

## Sheet: S file 1j
Supplementary file 1j. Predictive performance of ICV in patients’ groups in STRATIFY.
Groups	N	R positive	P positive	R negative	P negative	R combined	P combined
Go trials
Control	19	0.38	0.107	0.4	0.088	0.39	0.096
AUD	79	0.22	0.038	0.36	0.001	0.29	0.007
MDD	87	0.36	<0.001	0.25	0.012	0.33	0.001
BN	42	0.41	0.006	0.43	0.004	0.44	0.004
AN	52	0.49	<0.001	0.53	<0.001	0.52	<0.001
Successful stop trials
Control	19	0.46	0.045	0.27	0.269	0.46	0.046
AUD	79	0.07	0.516	0.1	0.364	0.06	0.571
MDD	87	0.23	0.033	0.3	0.005	0.28	0.009
BN	42	0.32	0.04	0.24	0.127	0.3	0.051
AN	52	0.42	0.002	0.27	0.056	0.37	0.008
Note: AUD, alcohol use disorder; MDD, major depression disorder; BN, bulimia Nervosa; AN, anorexia nervosa. N, number of subjects.

[truncated: 14 more sheets: S file 1k, S file 1l, S file 1m, S file 1n, S file 1o, S file 1p, S file 1q, S file 1r, S file 1s, S file 1t, S file 1u, S file 1v, S file 1w, S file 1x]
